# **Title: Male-mediated maturation in a wild primate**

**Authors:** Amy Lu<sup>1,2\*</sup>, Jacob A. Feder<sup>2</sup>, Noah Snyder-Mackler<sup>3,4</sup>, Thore J. Bergman<sup>5,6</sup>, Jacinta C. Beehner<sup>6,7\*</sup>

## **Affiliations:**

<sup>1</sup>Department of Anthropology, Stony Brook University, Stony Brook, NY

<sup>2</sup>Interdepartmental Program in Anthropological Sciences, Stony Brook University, Stony Brook, NY

<sup>3</sup>School of Life Sciences, Arizona State University, Tempe, AZ.

<sup>4</sup>Center for Evolution and Medicine, Arizona State University, Tempe, AZ.

<sup>5</sup>Department of Ecology and Evolution, University of Michigan, Ann Arbor, MI.

<sup>6</sup>Department of Psychology, University of Michigan, Ann Arbor, MI.

<sup>7</sup>Department of Anthropology, University of Michigan, Ann Arbor, MI.

\*Correspondence to: Amy Lu (email: [amy.lu@stonybrook.edu](mailto:amy.lu@stonybrook.edu)), Jacinta C. Beehner (email: [jbeehner@umich.edu](mailto:jbeehner@umich.edu))

**Abstract:** In humans, a controversial hypothesis suggests that father absence promotes early puberty in daughters. Data from rodents confirm females accelerate maturation with exposure to novel males (“Vandenbergh effect”) and delay it with exposure to male relatives. Here, we report the first case of male-mediated maturation in a wild primate, geladas (*Theropithecus gelada*). Females were more likely to mature after a change in the reproductive male: some matured earlier than expected (Vandenbergh effect) and some later (due to father presence). Novel males stimulated a surge in estrogens for all immature females - even females too young to mature. Although male-mediated puberty accelerated first births, the effect was modest, suggesting that alternative scenarios, such as co-evolution with the Bruce effect (male-mediated fetal loss) may explain this phenomenon.

**One Sentence Summary:** Novel males induce an estrogen surge, male-mediated puberty, and a head-start on reproduction for immature female geladas.

## Main Text:

In recent decades, the age at puberty for adolescent girls has been steadily decreasing worldwide (1). This trend for earlier puberty has largely been attributed to the growing obesity epidemic (2). However, a more controversial hypothesis pervades the human literature – mainly, that adverse childhood experiences, particularly those related to father absence, promote early puberty in adolescents (3–5). Although this hypothesis has gained some support (6–8), it is difficult in humans to separate the effects of father-absence from the effects of stress-related challenges of a dysfunctional family environment that often (but not always (9)) accompany father-absence.

To identify the specific role of the male environment on female maturation, we can look to animal models for answers. More than 50 years ago, John Vandenberg conducted a series of experiments demonstrating that female mice mature earlier if they are housed with an unrelated adult male (10). This “Vandenberg effect” – the acceleration of maturation by the presence of an unrelated male – has since been found in other rodents, several domestic livestock, and one marsupial (Table 1). The mechanism for the Vandenberg effect has been well-characterized in rodents, comprising a combination of social and chemical signals (11–13). The chemical signals derive from a male’s urine, and is likely to be urinary estradiol (14, 15). Both exogenous (16) and endogenous (17) estradiol are known to promote uterine growth in females. Moreover, in a related phenomenon, females in many rodent taxa experience a delay in maturation when continually exposed to their male kin (mainly fathers and brothers). The male-kin delay in pubertal onset often occurs in species that also exhibit the Vandenberg effect, suggesting that the two effects may be mechanistically linked (**Table S1**).

Despite debates on whether father-absence accelerates or father-presence delays puberty in humans (18), we have surprisingly limited comparative data from primates and none from natural settings. We have two hints from captive primates that the male environment may mediate pubertal changes in females; male turnover was associated with early puberty in two species of galagos (19) and in one anecdotal account from hamadryas baboons (20). Although the small-bodied, cooperatively breeding callitrichids routinely show socially mediated puberty (21), this seems largely driven by the suppressive effects of females, and not males (22).

Moreover, despite extensive study of the proximate mechanisms behind male-mediated puberty in rodents, we have no data on the adaptive function of this phenomenon in rodents or in any other taxa. Life history theory suggests that females should optimize the timing of maturation in response to unpredictable social conditions: if only related males are present, females should remain immature and continue to invest energy in growth; however, if an unrelated male arrives, females should mature and shunt energy to reproduction (23). Thus, male-mediated maturation may be adaptive because it can accelerate a female’s reproductive career when conditions are optimal. Alternative scenarios are also possible, however. For example, the adaptive benefit of male-mediated maturation may hinge on coinciding the start of a female’s reproductive career with the arrival of a male - for instance, to avoid costs of infanticide in species with high male turnover rates. Testing these hypotheses requires data from

longitudinal studies in wild animals, where we can quantify whether accelerated maturation or timing maturation with the arrival of novel males can influence reproductive success.

Here, we used 14 years of demographic and hormone data to test for male-mediated maturation in a wild primate, the gelada (*Theropithecus gelada*). Previously, geladas were shown to exhibit the Bruce effect, a phenomenon where pregnant females spontaneously abort following the arrival of a novel male (24, 25). Around the same time, it was shown that the Vandenberg effect accompanies the Bruce effect in mice and that the same mechanism mediates both effects (14); exogenous estradiol from a novel male's urine causes immature females to accelerate maturation and causes recently inseminated females to abort (14, 26). This shared mechanism prompted us to examine the effects of the males on the timing of female puberty in geladas, including acceleration due to novel males and delay due to father-presence. We then tested if estrogens might be associated with male-mediated reproductive maturation, and examined putative benefits of male-mediated reproductive maturation.

To test for male-mediated maturation, we collected demographic and behavioral data from a wild population of geladas living in the Simien Mountains National Park, Ethiopia. Geladas are catarrhine primates that live in polygynous family units ("reproductive units") comprising one dominant breeding male ("leader male"), 1-12 related, adult females, and their dependent offspring (27). Reproductive success for leader males depends on maintaining control over the unit. Threats to leader males come from "bachelor" males residing in all-male groups, who challenge and defeat leader males ("male takeover"), allowing the successful bachelor to gain reproductive access to the unit's females (28). Takeovers are semi-seasonal and each male is replaced approximately every 2.74 years (89 takeovers across 228 unit-years of study) - usually well before his daughters reach maturity around 5 years of age. However, in this population, both male tenure (<1mo - 8.1 years, N=67) and age at maturation (3.5-6.5 years, N=80) are highly variable, creating the potential for overlap. We recorded female maturations based on the first signs of sex skin swelling on a female's chest (29). Such swellings are extremely conspicuous (**Fig. 1a**) and are tightly correlated with changes in fecal estrogens (**Fig. S1**), indicating that they serve as an accurate morphological proxy for reproductive maturation.

First, we analyzed demographic data from 80 immature females across 28 takeovers during a 14-year period (Jan 2006 - Jul 2019) to determine if maturations increased following the arrival of a new male. Females were nearly three times more likely to mature after male takeovers (HR = 2.86,  $z = 3.25$ ,  $P = 0.001$ ; **Fig. 1b**). However, females were less likely to mature when their father was still the leader male in their social unit (HR = 0.66,  $z = -4.49$ ,  $P < 0.0001$ ; **Fig. S2**). Notably, the hazard ratio of father presence was not consistent over time ( $\chi^2 = 4.66$ ,  $P = 0.03$ ) indicating that the suppressive effect of fathers decreased with female age. Similarly, older females were more likely to mature following male takeovers than younger females (generalized linear mixed model:  $\beta = 2.44$ ,  $z = 3.20$ ,  $P = 0.001$ ; **Table S2**). A female experiencing a male takeover at the median age of maturation (4.77 years) would have a 67.5% likelihood of maturing within the next three months; however, by 6 years of age, this effect approaches 100% (**Fig. S3**). Furthermore, while takeovers in general lift the inhibition of maturation in gelada

females, the presence of fathers as primary breeding males counters this effect. We found that, on average, male takeovers accelerated maturation by 4.6 months (linear mixed model:  $\beta = -0.383$ ,  $t = -2.80$ ,  $P = 0.007$ ;  $N=80$ ; **Fig. 2, Table S2**), and father-presence delayed maturation by 5.2 months ( $\beta = 0.434$ ,  $t = 3.61$ ,  $P = 0.0005$ ).

Next, we investigated one putative mechanism for the observed male-mediated effects on female maturation. In mice, male urinary estradiol was absorbed by immature females, causing immediate increases in ovarian and uterine weights, which led to maturation (30). To examine whether a similar estradiol-based mechanism occurs in geladas, we analyzed hormonal data from 51 juvenile females, including 42 females with known dates of maturations and 9 females that were only observed as juveniles that had yet to mature. Using radioimmunoassay of fecal estrogens (24), we tested if the arrival of a new male increased female fecal estrogen metabolites for immature females during the immediate 30 days following the takeover (physiological effects of males are expected to be immediate, preceding subsequent effects on sex skin swellings (**Fig. S1**)).

Outside of takeovers, estrogen metabolites ranged from 0.06-10.31 ng/g; however, following male takeovers, these values more than doubled (pre-takeover mean=1.47; post-takeover mean=3.15 ng/g; **Fig. 3a**). This observation parallels those in mice (31, 32): novel males trigger an immediate rise in estrogens for immature females. These effects were not limited to females of maturational age: we found that estrogens increased in immature females of all age classes ( $\beta = 0.54$ ,  $t = 8.54$ ,  $P < 0.0001$ ; **Fig. 3b, Table S4**) - even females as young as one year old, which is years younger than the earliest age at maturation. Notably, no gelada females under three years of age matured in response to takeovers, indicating that this brief rise in estrogens is not, by itself, sufficient to induce maturation in the youngest females.

Although the surge in estrogens that accompanies typical mammalian maturation derives from endogenous sources (e.g., ovaries, adrenals), most examples of Vandenberg-stimulated maturation derive from exogenous sources (e.g., male urinary estrogens). We currently do not know whether the gelada spike in estrogens after takeovers is due to endogenous or exogenous sources. However, we propose that they are endogenous for two reasons: catarrhine primates, like geladas, do not have a functioning vomeronasal organ (33), the primary structure that is known to process chemosignals (34), and geladas live in large societies of up to 1200 individuals (27), making it difficult for a system of chemical communication to target a specific individual. Catarrhine primates have replaced the chemosensory input used by most other mammals with cognitive processing of environmental cues (35). Therefore, it is more likely that such a mechanism derives from socio-cognitive input, followed by downstream neuroendocrine changes in the hypothalamic-pituitary gonadal (HPG) axis that parallel those confirmed in other mammals (e.g., the stimulation of gonadotropin releasing hormone (GnRH) surges) (36). Regardless, it appears that females must be physiologically “ready” (i.e., have reached some critical threshold) before estradiol can stimulate reproductive maturation. In prepubertal females, estrogens exert negative feedback on the HPG axis, preventing the GnRH surges necessary for the initiation of puberty (37). As females approach the pubertal transition, the inhibitory

influence of estrogens on the HPG axis decreases, eventually switching to a stimulatory one that initiates the development of the female reproductive tract, uterine growth (15), functional menstrual cycles, sexual behavior, and for some primates, the development of sexual swellings (38).

Despite being documented in about two dozen mammalian taxa (**Table S1**), we currently have no evidence that male-mediated maturation is adaptive. There are three possible adaptive benefits. First, the benefits of the Vandenberg effect may hinge on whether it accelerates the time to first successful reproduction. Indeed, gelada females that matured earlier also had an earlier first birth ( $\beta = 0.86$ ,  $t = 7.75$ ,  $P < 0.0001$ ;  $N = 62$ , **Fig. S4**). Given their earlier ages at maturation, females that experienced a male-mediated maturation gained a ~4-month head start on reproduction, resulting in a modest 0.14 offspring advantage (based on an interbirth interval of 2.44 years) across a lifetime, all else being equal (e.g., longevity).

Second, this modest head start on reproduction may not be the primary advantage. Male-mediated puberty (regardless of whether it occurs early, on-time, or later) may bestow a timing advantage for female geladas. The arrival of novel males carries two costs for adult females: the Bruce effect for pregnant females (24) and infanticide for lactating females (39); and selection may therefore favor females that time the start of a reproductive event with the arrival of a new male (24). That is, females that time conceptions with male takeovers should have more time to gestate and wean an infant before another male takeover occurs. This timing hypothesis is a bit more difficult to predict for immature female geladas because they exhibit a period of “adolescent sterility” after maturation (1.42 years;  $N = 94$  females,  $SD = 0.47$  years). Nevertheless, females that initiate this process at the time of male takeovers may have an advantage. We found some support for this hypothesis. Females that matured at the time of a male takeover subsequently “bought” themselves more time to get through this sterile period, conceive, gestate, and wean their first offspring before the next male takeover (linear mixed model:  $\beta = 359.4$ ;  $t = 2.56$ ,  $P = 0.01$ ;  $N = 63$ , **Table S5**); such females were takeover free for 1087 days (2.98 years,  $SE = 160$  days) following their maturation, while all other females (“control females”) were takeover free for only 727 days (1.99 years,  $SE = 116$  days). Thus, on average, females with male-mediated maturation are expected to have a 1-year-old infant at the time of the next takeover (such infants are less susceptible to infanticide (39)) while other females are expected to have a newborn infant. Male-mediated maturation may, therefore, help females avoid the Bruce effect and infanticide that accompany male takeovers. To directly test the second of these scenarios, we examined first-infant survival for male-mediated and control maturations. Contrary to expectations, male-mediated puberty did not ensure higher survival for these females’ first infants (survival in relation to all causes of infant mortality: 12/16, 75.0%; survival in relation to takeover-related infant mortality: 2/4, 50%) compared to all other females (all causes: 55/63, 87.3 %, Fisher exact test;  $P = 0.25$ ; takeover-related: 3/8, 37.5%).

Third, we expect that sensitivity to the arrival of novel males is necessary to immediately lift the puberty inhibition caused by father-presence. It is reasonable to assume that the neuroendocrine process that releases delayed-females from puberty inhibition due to father-

presence is the same as that releasing all females from inhibition following the arrival of novel males. There is ample support for the selective advantage behind inbreeding avoidance (40, 41), with costs as high as an 87% reduction in lifetime fitness (42). Although we are unable to directly test inbreeding costs in geladas (we only observed one instance of a father mating with his daughter), gelada females lose only 0.85 months until their first birth for every one-month of maturational delay, resulting in 0.15 fewer offspring across a lifetime. The benefits to avoiding inbreeding are therefore likely to outweigh the costs, favoring delayed maturation in the presence of fathers.

Finally, female sensitivity to the arrival of novel males may simply be a by-product of the Bruce effect. The Bruce effect is adaptive in geladas (24) and is thought to also be adaptive in other taxa (43). Moreover, studies have shown that the Vandenberg and Bruce effects are mediated by the same mechanism (14, 26). Male-mediated maturation may therefore be a consequence of selection for the Bruce-effect. This scenario is particularly likely given that the ability to terminate gestation in response to infanticide risk may be adaptive across the entire lifespan, while maturing in response to a novel male is only adaptive for females' first-infants. As long as Vandenberg is not costly, this putative pleiotropy between the two would endure. Thus far, all cases in which the Bruce and Vandenberg effects have been investigated demonstrate complete overlap between the two phenomena (**Table S1**). However, a proper comparative analysis will depend on filling in missing data and incorporating additional mammalian taxa, particularly to establish evidence of absence of either effect.

In sum, we found that (1) male-mediated maturation occurred in a wild primate, (2) the effect is accompanied (and possibly mediated) by a similar mechanism to rodents, a surge in estrogens; and (3) male-mediated maturation may be adaptive, as it accelerates the time to first reproduction and ensures a female will immediately mature when her father is no longer the breeding male. With respect to synchronizing maturation with the arrival of a new male, females with male-mediated maturation appeared to buy more time to avoid the costs of another male takeover prior to weaning their first offspring. However, this bought time did not translate into higher infant survival, likely because the variance in this extended safety net was high. Remarkably, the Vandenberg effect co-occurs with the Bruce effect in all cases observed to date. Therefore, even if it bestows limited fitness benefits for immature females, it may simply reflect the sensitivity that females retain to the arrival of new males - a plastic physiological response driven by fitness benefits associated with the Bruce effect. As such, we propose that all male-mediated puberty (not just *accelerated* puberty characterized by previous definitions of the Vandenberg effect) will accompany the Bruce effect. Further, we propose that the term "Vandenberg effect" should be broadened to encompass all male-mediated puberty and not just accelerated puberty, as the same process governs puberty onset regardless of whether it is early, on-time, or late.

Taken together, these data indicate that puberty in a non-human primate is highly sensitive to the identity of potential male mates, with novel males accelerating and biological fathers delaying pubertal onset. These data from a catarrhine primate suggest that humans may



also have retained sensitivity to individual household males, however, the adaptive purpose of retaining such sensitivity in humans is far less clear. Although accelerated puberty might be generally beneficial, it is difficult to understand how timing puberty to the arrival of new males in human societies might improve fetal or infant survival. Furthermore, given the weak (or non-existent) evidence for sexually-selected infanticide and the Bruce effect in humans (44), it is unlikely to have persisted due to evolutionary pleiotropy.

Finally, we were unable to probe interindividual variation in this sensitivity to males. Beyond a female's age (which presumably tracks body size and leptin concentrations (45)) and father presence, what factors allow one female to lift pubertal inhibition while another does not when faced with a new male? Such analyses (similar to those examining the effects of early life adversity (46)) must be restricted to the subset of females that experience a male takeover, comparing those that do mature to those that do not. As with the Bruce effect (25), answering this question relies on not only monitoring our gelada population for another 14 years but also documenting the presence and absence of such phenomena across a wide range of mammalian taxa.

## References and Notes:

1. A. Papadimitriou, in *Puberty: Physiology and Abnormalities*, P. Kumanov, A. Agarwal, Eds. (Springer International Publishing, Cham, 2016), pp. 121–136.
2. B. Solorzano, M. Christine, C. R. McCartney, Obesity and the pubertal transition in girls and boys. *Reproduction*. **140**, 399–410 (2010).
3. P. Draper, H. Harpending, Father absence and reproductive strategy: an evolutionary perspective. *J. Anthropol. Res.* **38**, 255–273 (1982).
4. J. Belsky, L. Steinberg, P. Draper, Childhood experience, interpersonal development, and reproductive strategy. An evolutionary theory of socialization. *Child Development*. **62**, 647–67– (1991).
5. B. J. Ellis, Timing of pubertal maturation in girls: an integrated life history approach. *Psychol. Bull.* **130**, 920–958 (2004).
6. L. Zhang, D. Zhang, Y. Sun, Adverse childhood experiences and early pubertal timing among girls: a meta-analysis. *Int. J. Environ. Res. Public Health*. **16** (2019) (available at <https://www.ncbi.nlm.nih.gov/pubmed/31412531>).
7. G. D. Webster, J. A. Graber, A. N. Gesselman, B. S. Crosier, T. O. Schember, A life history theory of father absence and menarche: a meta-analysis. *Evol. Psychol.* **12**, 273–294 (2014).
8. G. D. Mishra, R. Cooper, S. E. Tom, D. Kuh, Early life circumstances and their impact on menarche and menopause. *Women's Health*. **5**, 175–190 (2009).

9. R. Sear, P. Sheppard, D. A. Coall, Cross-cultural evidence does not support universal acceleration of puberty in father-absent households. *Philos. Trans. R. Soc. Lond. B Biol. Sci.* **374**, 20180124 (2019).
10. J. G. Vandenberg, Effect of the presence of a male on the sexual maturation of female mice. *Endocrinology*. **81**, 345–349 (1967).
11. L. C. Drickamer, Sexual maturation of female house mice: social inhibition. *Dev. Psychobiol.* **7**, 257–265 (1974).
12. L. C. Drickamer, Contact stimulation and accelerated sexual maturation of female mice. *Behavioral Biology*. **15** (1975), pp. 113–115.
13. F. H. Bronson, J. A. Maruniak, Male-induced puberty in female mice: evidence for a synergistic action of social cues. *Biol. Reprod.* **13**, 94–98 (1975).
14. A. C. Guzzo, J. Jheon, F. Imtiaz, D. deCatanzaro, Oestradiol transmission from males to females in the context of the Bruce and Vandenberg effects in mice (*Mus musculus*). *Reproduction*. **143**, 539–548 (2012).
15. D. deCatanzaro, Sex steroids as pheromones in mammals: the exceptional role of estradiol. *Horm. Behav.* **68**, 103–116 (2015).
16. H. Tinwell, J. Ashby, Sensitivity of the immature rat uterotrophic assay to mixtures of estrogens. *Environ. Health Perspect.* **112**, 575–582 (2004).
17. T. Sato, G. Wang, M. P. Hardy, T. Kurita, G. R. Cunha, P. S. Cooke, Role of systemic and local IGF-I in the effects of estrogen on growth and epithelial proliferation of mouse uterus. *Endocrinology*. **143**, 2673–2679 (2002).
18. D. C. Rowe, in *Genetic Influences on Human Fertility and Sexuality: Theoretical and Empirical Contributions from the Biological and Behavioral Sciences*, J. L. Rodgers, D. C. Rowe, W. B. Miller, Eds. (Springer Science + Business Media, New York, 2000), pp. 147–168.
19. M. K. Izard, in *Socioendocrinology of Primate Reproduction*, T. E. Ziegler, F. B. Bercovitch, Eds. (Wiley-Liss, Inc., New York, NY, US, 1990), vol. 13 of *Monographs in Primatology*, pp. 159–186.
20. F. Colmenares, M. Gomendio, Changes in female reproductive condition following male take-overs in a colony of hamadryas and hybrid baboons. *Folia Primatol.* **50**, 157–174 (1988).
21. W. Saltzman, in *Sexual Selection and Reproductive Competition in Primates: New Perspectives and Directions*. *American Society of Primatologists* (2003; <http://citeseerx.ist.psu.edu/viewdoc/summary?doi=10.1.1.211.1566>).



22. J. A. French, in *Cooperative Breeding in Mammals*, N. G. Solomon, J. A. French, Eds. (Cambridge University Press, 1997), pp. 34–75.
23. S. C. Stearns, *The Evolution of Life Histories* (OUP Oxford, 1992).
24. E. K. Roberts, A. Lu, T. J. Bergman, J. C. Beehner, A Bruce effect in wild geladas. *Science*. **335**, 1222–1225 (2012).
25. M. N. Zippel, E. K. Roberts, S. C. Alberts, J. C. Beehner, Male-mediated prenatal loss: Functions and mechanisms. *Evol. Anthropol.* **28**, 114–125 (2019).
26. J. B. Thorpe, D. deCatanzaro, Oestradiol treatment restores the capacity of castrated males to induce both the Vandenberg and the Bruce effects in mice (*Mus musculus*). *Reproduction*. **143**, 123–132 (2012).
27. N. Snyder-Mackler, J. C. Beehner, T. J. Bergman, Defining higher levels in the multilevel societies of geladas (*Theropithecus gelada*). *Int. J. Primatol.* **33**, 1054–1068 (2012).
28. D. J. Pappano, J. C. Beehner, Harem-holding males do not rise to the challenge: androgens respond to social but not to seasonal challenges in wild geladas. *R. Soc. Open Sci.* **1**, 140081 (2014).
29. E. K. Roberts, A. Lu, T. J. Bergman, J. C. Beehner, Female reproductive parameters in wild geladas (*Theropithecus gelada*). *Int. J. Primatol.* **38**, 1–20 (2017).
30. F. H. Bronson, M. H. Stetson, Gonadotropin Release in Prepubertal Female Mice Following Male Exposure: A Comparison with the Adult Cycle'. *Biol. Reprod.* **9**, 449–459 (1973).
31. F. H. Bronson, Male-induced precocial puberty in female mice: confirmation of the role of estrogen. *Endocrinology*. **96**, 511–514 (1975).
32. F. H. Bronson, C. Desjardins, Circulating concentrations of FSH, LH, estradiol, and progesterone associated with acute, male-induced puberty in female mice. *Endocrinology*. **94**, 1658–1668 (1974).
33. J. Zhang, D. M. Webb, Evolutionary deterioration of the vomeronasal pheromone transduction pathway in catarrhine primates. *Proc. Natl. Acad. Sci. U. S. A.* **100**, 8337–8341 (2003).
34. E. B. Keverne, The vomeronasal organ. *Science*. **286**, 716–720 (1999).
35. E. B. Keverne, F. L. Martel, C. M. Nevison, Primate brain evolution: genetic and functional considerations. *Proc. Biol. Sci.* **263**, 689–696 (1996).
36. A. E. Herbison, Control of puberty onset and fertility by gonadotropin-releasing hormone neurons. *Nat. Rev. Endocrinol.* **12**, 452–466 (2016).

37. T. M. Plant, Neuroendocrine control of the onset of puberty. *Front. Neuroendocrinol.* **38**, 73–88 (2015).
38. T. M. Plant, in *The Physiology of Reproduction*, E. Knobil, J. D. Neil, Eds. (Raven Press, Ltd, New York, 1994), pp. 453–485.
- 5 39. J. C. Beehner, T. J. Bergman, Infant mortality following male takeovers in wild geladas. *Am. J. Primatol.* **70**, 1152–1159 (2008).
40. S. F. Blouin, M. Blouin, Inbreeding avoidance behaviors. *Trends Ecol. Evol.* **3**, 230–233 (1988).
- 10 41. J. L. Hill, Peromyscus: effect of early pairing on reproduction. *Science.* **186**, 1042–1044 (1974).
42. K. A. Harrison, M. J. L. Magrath, J. D. L. Yen, A. Pavlova, N. Murray, B. Quin, P. Menkhorst, K. A. Miller, K. Cartwright, P. Sunnucks, Lifetime fitness costs of inbreeding and being inbred in a critically endangered bird. *Curr. Biol.* **29**, 2711–2717.e4 (2019).
- 15 43. L. A. Ebensperger, Strategies and counterstrategies to infanticide in mammals. *Biol. Rev. Camb. Philos. Soc.* **73**, 321–346 (1998).
44. S. B. Hrdy, *Mother Nature: A History of Mothers, Infants, and Natural Selection* (Pantheon Books, New York, 1999).
- 20 45. M. Manfredi-Lozano, J. Roa, F. Ruiz-Pino, R. Piet, D. Garcia-Galiano, R. Pineda, A. Zamora, S. Leon, M. A. Sanchez-Garrido, A. Romero-Ruiz, C. Dieguez, M. J. Vazquez, A. E. Herbison, L. Pinilla, M. Tena-Sempere, Defining a novel leptin–melanocortin–kisspeptin pathway involved in the metabolic control of puberty. *Molecular Metabolism.* **5**, 844–857 (2016).
- 25 46. D. Nettle, M. Bateson, Adaptive developmental plasticity: what is it, how can we recognize it and when can it evolve? *Proceedings of the Royal Society B: Biological Sciences.* **282**, 20151005 (2015).
47. A. Lu, T. J. Bergman, C. McCann, A. Stinespring-Harris, J. C. Beehner, Growth trajectories in wild geladas (*Theropithecus gelada*). *Am. J. Primatol.* **78**, 707–719 (2016).
48. E. Tinsley Johnson, N. Snyder-Mackler, A. Lu, T. J. Bergman, J. C. Beehner, Social and ecological drivers of reproductive seasonality in geladas. *Behav. Ecol.* **29**, 574–588 (2018).
- 30 49. N. Snyder-Mackler, S. C. Alberts, T. J. Bergman, Concessions of an alpha male? Cooperative defence and shared reproduction in multi-male primate groups. *Proc. Biol. Sci.* **279**, 3788–3795 (2012).
- 35 50. J. C. Jarvey, B. S. Low, D. J. Pappano, T. J. Bergman, J. C. Beehner, Graminivory and fallback foods: annual diet profile of geladas (*Theropithecus gelada*) living in the Simien Mountains National Park, Ethiopia. *Int. J. Primatol.* **39**, 105–126 (2018).

51. E. Tinsley Johnson, N. Snyder-Mackler, A. Lu, T. J. Bergman, J. C. Beehner, Social and ecological drivers of reproductive seasonality in geladas. *Behav. Ecol.* **29**, 574–588 (2018).
52. T. Therneau, A package for survival analysis in S. version R Package Version 2.38 (2015).
53. D. Bates, M. Maechler, B. Bolker, S. Walker, Fitting linear mixed-effects models using lme4. *ArXiv* (2014) (available at <http://arxiv.org/abs/1406.5823>).
54. A. Kuznetsova, P. B. Brockhoff, R. H. B. Christensen, lmerTest: tests in linear mixed effects models. *J. Stat. Softw.* **82** (2017).
55. R. R Development Core Team, Others, R: A language and environment for statistical computing (2011).
56. H. M. Bruce, An exteroceptive block to pregnancy in the mouse. *Nature.* **184**, 105 (1959).
57. H. M. Bruce, A block to pregnancy in the mouse caused by proximity of strange males. *J. Reprod. Fertil.* **1**, 96–103 (1960).
58. W. G. Breed, Environmental factors and reproduction in the female hopping mouse, *Notomys alexis*. *J. Reprod. Fertil.* **45**, 273–281 (1975).
59. V. Marashi, T. Rülcke, The Bruce effect in Norway rats. *Biol. Reprod.* **86**, 1–5 (2012).
60. J. G. Vandenberg, Acceleration of sexual maturation in female rats by male stimulation. *J. Reprod. Fertil.* **46**, 451–453 (1976).
61. N. Pillay, A. A. Kinahan, Mating strategy predicts the occurrence of the Bruce effect in the Vlei rat *Otomys irroratus*. *Behaviour.* **146**, 139–151 (2009).
62. B. E. Eleftheriou, F. H. Bronson, M. X. Zarrow, Interaction of olfactory and other environmental stimuli on implantation in the deer mouse. *Science.* **137**, 764 (1962).
63. L. G. Teague, E. L. Bradley, The existence of a puberty accelerating pheromone in the urine of the male prairie deer mouse (*Peromyscus maniculatus bairdii*). *Biol. Reprod.* **19**, 314–317 (1978).
64. C. Rohrbach, Investigation of the Bruce effect in the Mongolian gerbil (*Meriones unguiculatus*). *J. Reprod. Fertil.* **65**, 411–417 (1982).
65. A. M. Kenney, R. L. Evans, D. A. Dewsbury, Postimplantation pregnancy disruption in *Microtus ochrogaster*, *M. pennsylvanicus* and *Peromyscus maniculatus*. *Reproduction.* **49**, 365–367 (1977).
66. M. J. Hasler, A. V. Nalbandov, The effect of weanling and adult males on sexual maturation in female voles (*Microtus ochrogaster*). *Gen. Comp. Endocrinol.* **23**, 237–238 (1974).
67. M. H. Schadler, Postimplantation abortion in pine voles (*Microtus pinetorum*) induced by strange males and pheromones of strange males. *Biol. Reprod.* **25**, 295–297 (1981).

68. R. A. Stehn, F. J. Jannett, Male-induced abortion in various Microtine rodents. *J. Mammal.* **62**, 369–372 (1981).
69. J. J. Lepri, J. G. Vandenberg, Puberty in pine voles, *Microtus pinetorum*, and the influence of chemosignals on female reproduction. *Biol. Reprod.* **34**, 370–377 (1986).
- 5 70. M. H. Schadler, Male siblings inhibit reproductive activity in female pine voles, *Microtus pinetorum*. *Biol. Reprod.* **28**, 1137–1139 (1983).
71. E. G. Y. Baddaloo, F. V. Clulow, Effects of the male on growth, sexual maturation, and ovulation of young female meadow voles, *Microtus pennsylvanicus*. *Can. J. Zool.* **59**, 415–421 (1981).
- 10 72. G. O. Batzli, L. L. Getz, S. S. Hurley, Suppression of growth and reproduction of microtine rodents by social factors. *J. Mammal.* **58**, 583–591 (1977).
73. E. J. Heske, Pregnancy interruption by strange males in the California vole. *J. Mammal.* **68** (1987), pp. 406–410.
- 15 74. F. V. Clulow, J. R. Clarke, Pregnancy-block in *Microtus agrestis* and induced ovulator. *Nature*. **219**, 511 (1968).
75. H. P. Andreassen, G. Gundersen, Male turnover reduces population growth: An enclosure experiment on voles. *Ecology*. **87** (2006), pp. 88–94.
76. A. Stubbe, S. Janke, Some aspects of social behaviour in the vole *Microtus brandti* [Radde, 1861]. *Pol. Ecol. Stud.* **20** (1994).
- 20 77. F. V. Clulow, E. A. Franchetto, P. E. Langford, Pregnancy failure in the red-backed vole, *Clethrionomys gapperi*. *J. Mammal.* **63** (1982), pp. 499–500.
78. J. A. Eccard, M. Dammhahn, H. Ylönen, The Bruce effect revisited: is pregnancy termination in female rodents an adaptation to ensure breeding success after male turnover in low densities? *Oecologia*. **185**, 81–94 (2017).
- 25 79. F. F. Mallory, R. J. Brooks, Infanticide and pregnancy failure: reproductive strategies in the female collared lemming (*Dicrostonyx groenlandicus*). *Biol. Reprod.* **22**, 192–196 (1980).
80. J. F. Hasler, E. M. Banks, The influence of mature males on sexual maturation in female collared lemmings (*Dicrostonyx groenlandicus*). *J. Reprod. Fertil.* **42**, 583–586 (1975).
- 30 81. P. M. Jensen, T. O. Gustafsson, Evidence for pregnancy failure in young female *Lemmus lemmus* and *Microtus oeconomus*. *Can. J. Zool.* **62**, 2568–2570 (1984).
82. R. N. Levin, R. E. Johnston, Social mediation of puberty: an adaptive female strategy? *Behav. Neural Biol.* **46**, 308–324 (1986).

83. M. P. M. Richards, Progesterone and pseudopregnancy in the golden hamster. *Reproduction*. **11** (1966), pp. 463–464.
84. U. W. Huck, U. William Huck, A. C. Bracken, R. D. Lisk, Female-induced pregnancy block in the golden hamster. *Behav. Neural Biol.* **38** (1983), pp. 190–193.
- 5 85. B. J. Weir, The role of the male in the evocation of oestrus in the cuis, *Galea musteloides* (Rodentia: Hystricomorpha). *J. Reprod. Fertil. Suppl.* **19**, 421–432 (1973).
86. F. Trillmich, C. Laurien-Kehnen, A. Adrian, S. Linke, Age at maturity in caviae and guinea-pigs (*Cavia aperea* and *Cavia aperea f. porcellus*): influence of social factors. *J. Zool.* **268**, 285–294 (2006).
- 10 87. J. L. Hoogland, Prairie dogs avoid extreme inbreeding. *Science*. **215**, 1639–1641 (1982).
88. B. A. Pettitt, J. M. Waterman, Reproductive delay in the female Cape ground squirrel (*Xerus inauris*). *J. Mammal.* **92**, 378–386 (2011).
89. K. Hackländer, W. Arnold, Male-caused failure of female reproduction and its adaptive value in alpine marmots (*Marmota marmota*). *Behav. Ecol.* **10**, 592–597(1999).
- 15 90. M. J. Stonerook, J. D. Harder, Sexual maturation in female gray short-tailed opossums, *Monodelphis domestica*, is dependent upon male stimuli. *Biol. Reprod.* **46**, 290–294 (1992).
91. B. H. Fadem, Evidence for the activation of female reproduction by males in a marsupial, the gray short-tailed opossum (*Monodelphis domestica*). *Biol. Reprod.* **33**, 112–116 (1985).
92. P. H. Brooks, D. J. A. Cole, “The effect of boar presence on the age at puberty of gilts” (School of Agriculture Report, University of Nottingham, 1969).
- 20 93. L. H. Thompson, J. S. Savage, Age at puberty and ovulation rate in gilts in confinement as influenced by exposure to a boar. *J. Anim. Sci.* **47**, 1141–1144 (1978).
94. M. K. Izard, J. G. Vandenberg, The effects of bull urine on puberty and calving date in crossbred beef heifers. *J. Anim. Sci.* **55** (1982).
- 25 95. K. H. Al-Gubory, Effects of the presence of rams during pregnancy on lambing performance in ewes. *Anim. Reprod. Sci.* **52** (1998), pp. 205–211.
96. E. G. O’Riordan, J. P. Hanrahan, Advancing first estrus in ewe lambs. *Farm Food Res.* **20**, 25–27 (1989).
97. P. Chemineau, Effect on oestrus and ovulation of exposing creole goats to the male at three times of the year. *J. Reprod. Fertil.* **67**, 65–72 (1983).
- 30 98. M. Chasles, D. Chesneau, C. Moussu, K. Poissenot, M. Beltramo, J. A. Delgadillo, P. Chemineau, M. Keller, Sexually active bucks are a critical social cue that activates the gonadotrope axis and early puberty onset in does. *Horm. Behav.* **106**, 81–92 (2018).

99. L. Bartoš, J. Bartošová, J. Pluháček, J. Šindelářová, Promiscuous behaviour disrupts pregnancy block in domestic horse mares. *Behav. Ecol. Sociobiol.* **65**, 1567–1572 (2011).
100. J. Berger, Induced abortion and social factors in wild horses. *Nature.* **303**, 59–61 (1983).
101. J. Pluháček, L. Bartoš, Male infanticide in captive plains zebra, *Equus burchelli*. *Anim. Behav.* **59**, 689–694 (2000).
102. B. L. Penzhorn, Reproductive characteristics of a free-ranging population of Cape mountain zebra (*Equus zebra zebra*). *J. Reprod. Fertil.* **73**, 51–57 (1985).
103. L. Bartoš, J. Bartošová, H. Chaloupková, A. Dušek, L. Hradecká, I. Svobodová, A sociobiological origin of pregnancy failure in domestic dogs. *Sci. Rep.* **6**, 22188 (2016).
104. B. C. R. Bertram, Social factors influencing reproduction in wild lions. *J. Zool.* **177**, 463–482 (1975).
105. D. Kerhoas, D. Perwitasari-Farajallah, M. Agil, A. Widdig, A. Engelhardt, Social and ecological factors influencing offspring survival in wild macaques. *Behav. Ecol.* **25**, 1164–1172 (2014).

# **Acknowledgements:**

We are grateful to the Ethiopian Wildlife and Conservation Authority for granting us permission to conduct this research. We also want to thank the staff and wardens of the Simien Mountains National Park, our Ethiopian staff (Esheti Jejaw, Ambaye Fanta, Setey Girmay, Yeshe Dessie, Tariku W/Aregay, Shifarew Asrat), our research assistants in the field (Clay Wilton, Julie Jarvey, Levi Morris, Tara Regan, Patsy DeLacey, Peter Clark, Evan Sloan, Liz Babbitt, and Maddie Melton), and our laboratory help (Teera Parr, Evelyn Pain).

**Funding:** The National Science Foundation (BCS-0715179, BCS-1723228, IOS-1255974, IOS-1854359, BCS-1723237, BCS-2010309), the Leakey Foundation, the National Geographic Society (NGS-8100-06, NGS-8989-11, NGS-1242, NGS-50409R-18), the Fulbright Scholars Program, the University of Michigan, Stony Brook University, and Arizona State University.

# **Author contributions:**

**Amy Lu** - Conceptualization, Data curation, Formal analysis, Funding acquisition, Investigation, Methodology, Project administration, Resources, Supervision, Validation, Writing original draft, Writing review and editing.

**Jacob A. Feder** - Formal analysis, Investigation, Methodology, Visualization, Writing original draft, Writing review and editing.

**Noah Snyder-Mackler** - Data curation, Funding acquisition, Project administration, Resources, Supervision, Writing review and editing.

**Thore J. Bergman** - Data curation, Funding acquisition, Project administration, Resources, Supervision, Writing review and editing.



**Jacinta C. Beehner** - Conceptualization, Data curation, Formal analysis, Funding acquisition, Investigation, Methodology, Project administration, Resources, Supervision, Validation, Writing original draft, Writing review and editing.

5 **Competing interests:** Authors declare no competing interests.

**Data and materials availability:** Data and code are available at [https://github.com/GeladaResearchProject/Lu\\_Vandenbergh\\_2020](https://github.com/GeladaResearchProject/Lu_Vandenbergh_2020).

10 **Supplementary Materials:**

Materials and Methods

Figures S1-S4

Table S1-S5

References 46-104

15

## Figures:

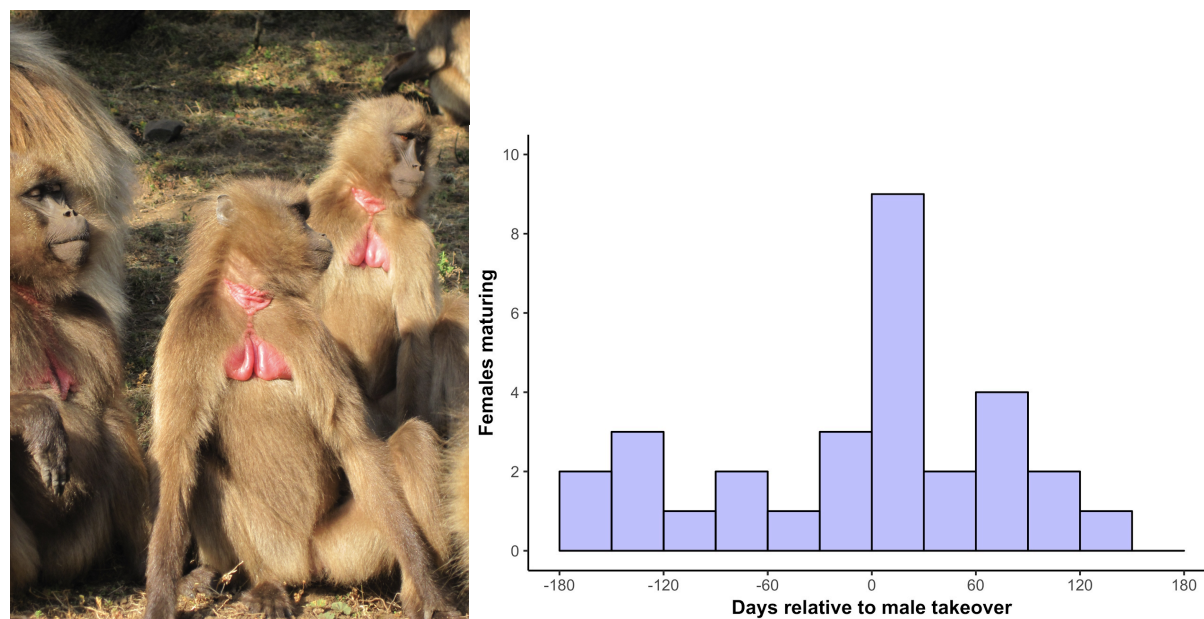

**Fig. 1. Females were more likely to mature during the three months following a male takeover.** The first sexual swelling in geladas for two females (photo by J. Jarvey, with permission)(**1a**). Histogram of 39 female maturations relative to the timing of a male takeover (days, +/- 6 months; **1b**). Histogram data were drawn from a sample of 55 maturations from females of known age and 25 maturations from females with estimated ages. 18.8% of all maturations occurred within the three months following takeovers. Note that maturations that did not occur within +/- 6 months of a takeover are not included in this figure.

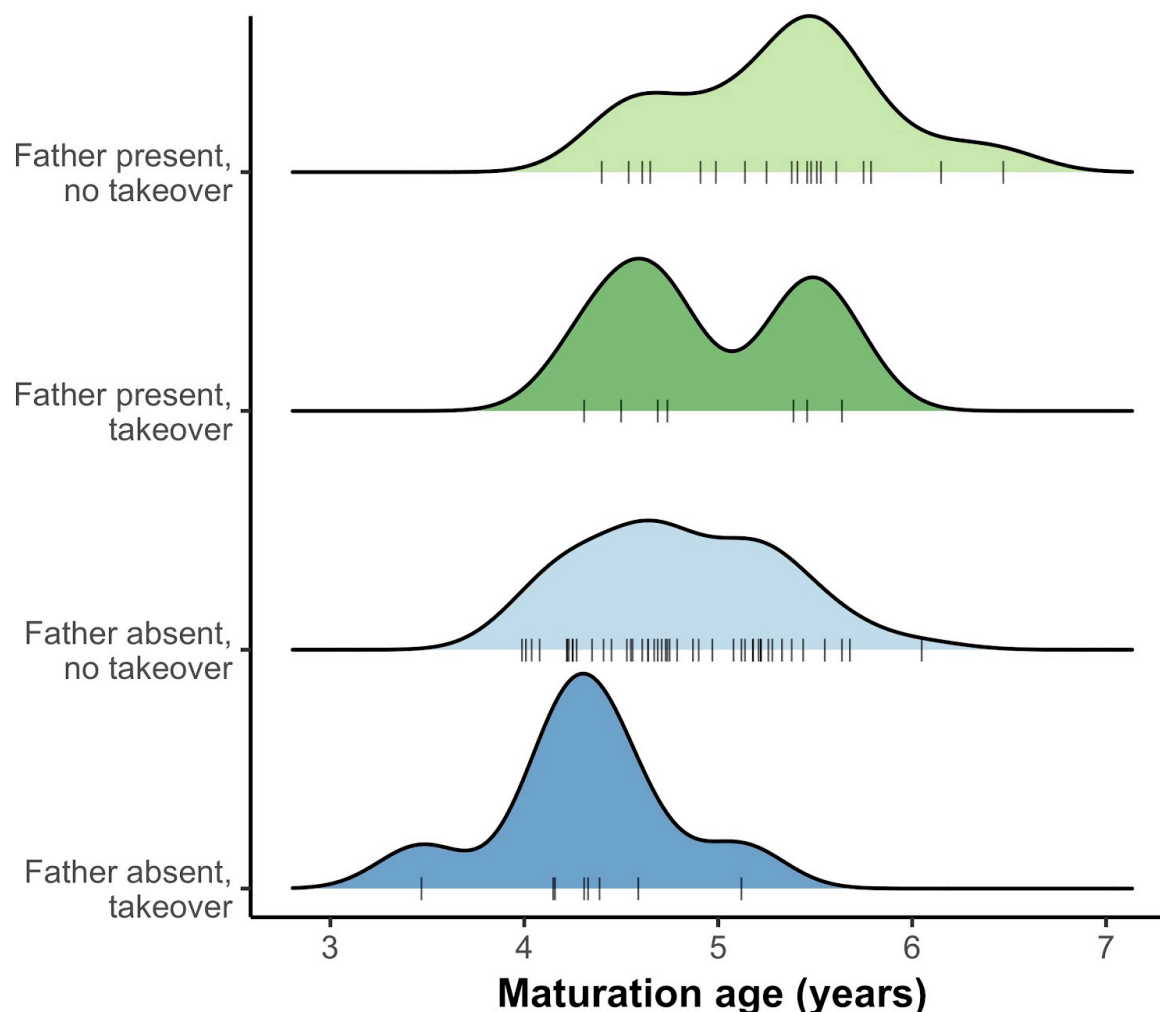

**Fig. 2. Females matured earlier following takeovers and later if their fathers were still the breeding male.** Ridge plot of 80 female maturations ages. Maturations are separated into four groups based on whether females' fathers were absent (**blue**) or present (**green**) at the minimum age at maturation (41.7 months) and whether females matured following (**light**) or not following (**dark**) a male takeover. The dashed line indicates the median age at maturation for all females (N=80).

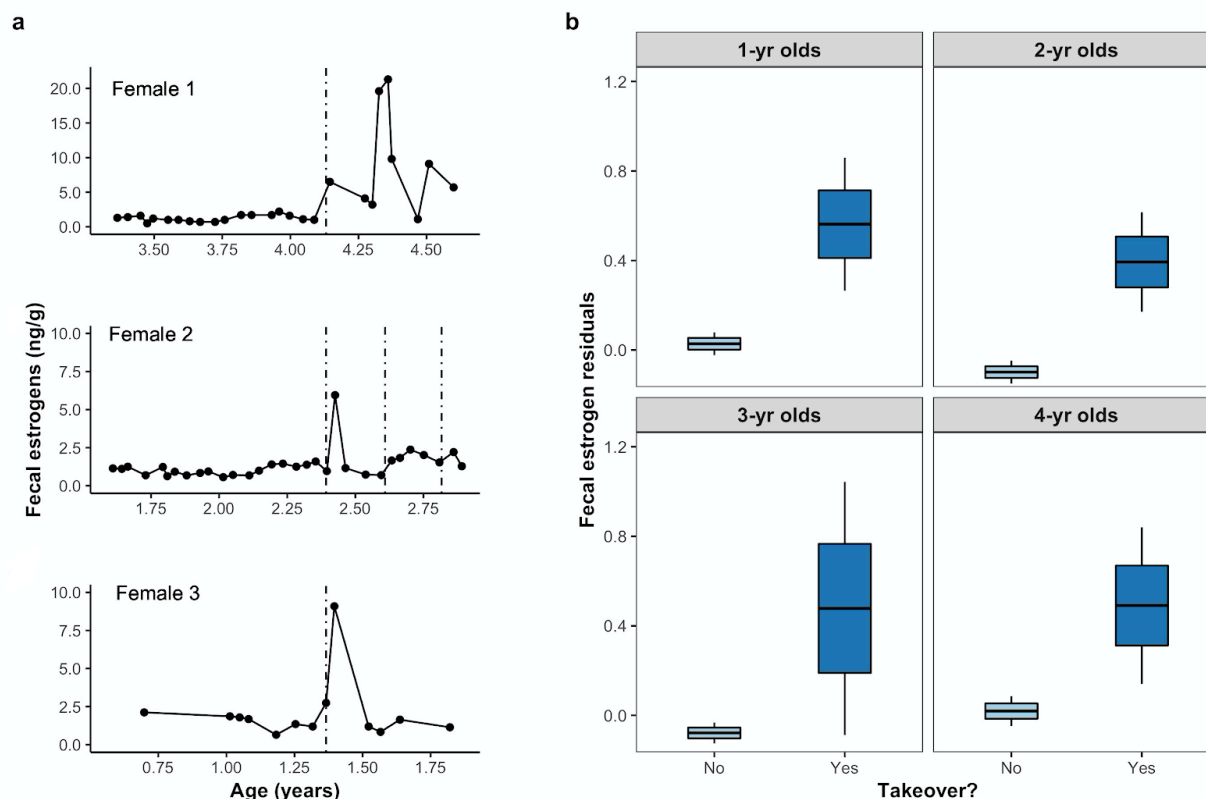

**Fig. 3. Male takeovers induced increases in estrogen levels in all pre-pubescent females. (A)**

Fecal estrogen metabolites for three representative adolescent females at different ages (Female 1 is four years old, Female 2 is two and a half years old, and Female 3 is one and a half years old) relative to the timing of male takeovers (indicated by a dashed line). More than one dashed line indicates multiple takeovers (3a). Residual fecal estrogen metabolites for females at different ages (1-4 years of age) either outside of ("no") or within the 30-day window after a takeover ("yes") (3b). Fecal estrogens presented as residuals controlling for female age, cumulative rainfall (previous 90 days), average minimum temperature (previous 30 days), whether the sample was collected within the 100 days before the female's first swelling, and methodological differences in sample extraction. For (3b), mean=solid line, standard error=box outline, 95% confidence interval=whiskers.
